# Supplementary material
Source: PubMed Central journal article supplement (PMC3576842)

A

| Pharmacokinetic Parameters |      |             |                     |       |             |         |                   |                   |                  |                  |                    |         |          |
|----------------------------|------|-------------|---------------------|-------|-------------|---------|-------------------|-------------------|------------------|------------------|--------------------|---------|----------|
| Route                      | Dose | Target Dose | AUC <sub>last</sub> | AUC   | AUC_%Extrap | AUC/D   | C <sub>last</sub> | T <sub>last</sub> | C <sub>max</sub> | T <sub>max</sub> | t <sub>1/2,z</sub> | MRT inf | MRT last |
|                            |      | μmol/kg     | hr*μM               | hr*μM | %           | hr*kg/L | μM                | hr                | μM               | hr               | hr                 | hr      | hr       |
| PO (100 mg/kg)             | PO   | 175.24      | 23.20               | 40.30 | 42.50       | 0.23    | 0.66              | 24.00             | 2.91             | 0.50             | 18.00              | 27.00   | 10.10    |

B

| Plasma Concentration (μM) |   |        |       |       |       |        |       |       |       |
|---------------------------|---|--------|-------|-------|-------|--------|-------|-------|-------|
| Time (hr)                 | 0 | 0.083  | 0.25  | 0.5   | 1     | 3      | 6     | 8     | 24    |
| Mean                      | 0 | 0.0330 | 1.20  | 2.91  | 1.75  | 0.723  | 0.359 | 1.30  | 0.659 |
| SD                        | 0 | 0.0335 | 0.296 | 0.189 | 0.290 | 0.0760 | 0.451 | 0.144 | 0.635 |

C

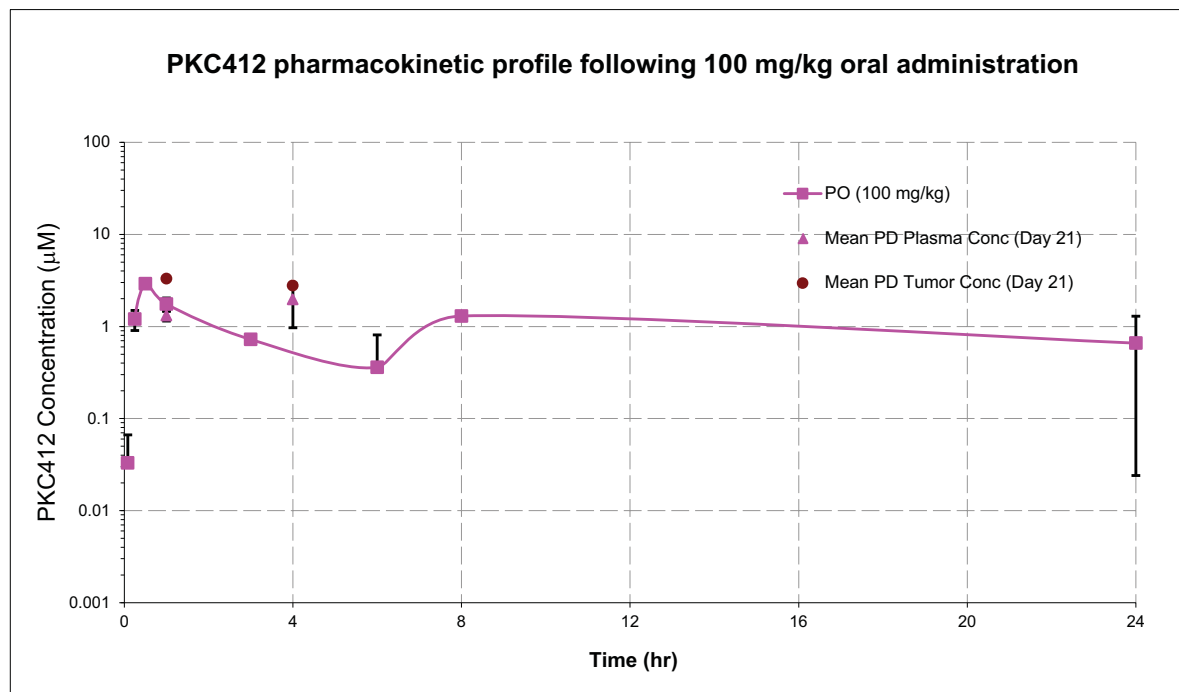

Supplement: NIHMS428041-supplement-8.pdf [file NIHMS428041-supplement-8.pdf]
