# Supplementary material
Source: PubMed Central journal article supplement (PMC3576842)

**A**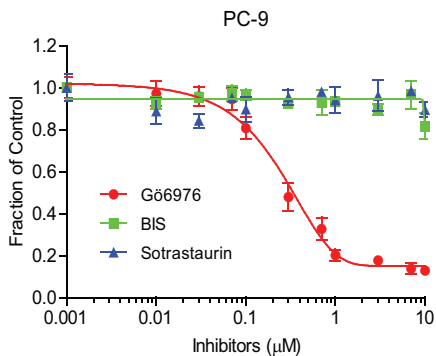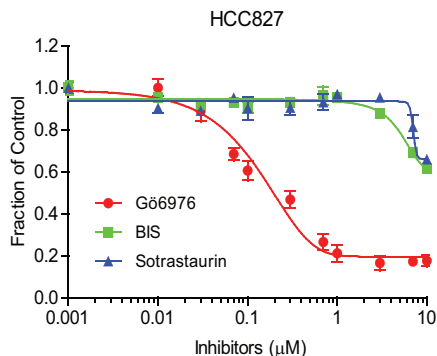**B**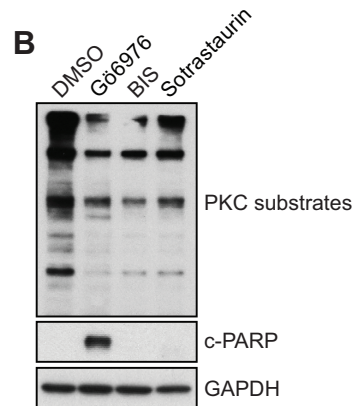**C**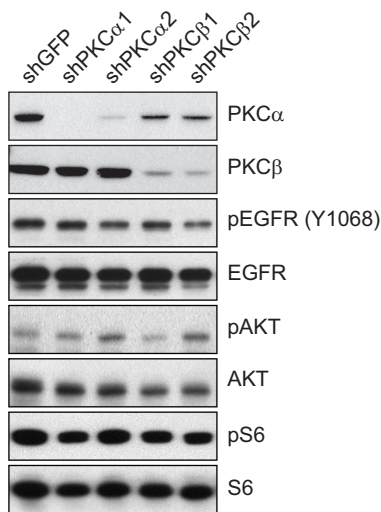**D**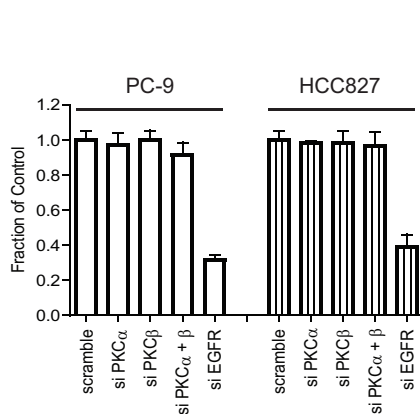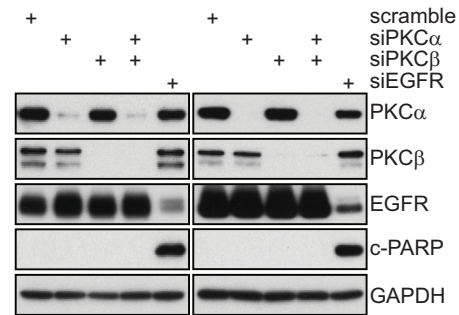

Supplement: NIHMS428041-supplement-2.pdf [file NIHMS428041-supplement-2.pdf]

A

| Compounds | <i>K<sub>i</sub></i> (nM) |                    |             |       |              |       |
|-----------|---------------------------|--------------------|-------------|-------|--------------|-------|
|           | Wild type                 | delE746_A750/T790M | L858R/T790M | T790M | delE746_A750 | L858R |
| PKC412    | 33                        | 3.2                | 2.4         | 5.2   | 24.3         | 41.5  |
| BIBW2992  | < 0.1                     | 3.5                | 2.8         | N.D.  | < 0.1        | 0.7   |
| WZ4002    | 13.6                      | 1.8                | 4           | 5     | 3.9          | 8.5   |

B

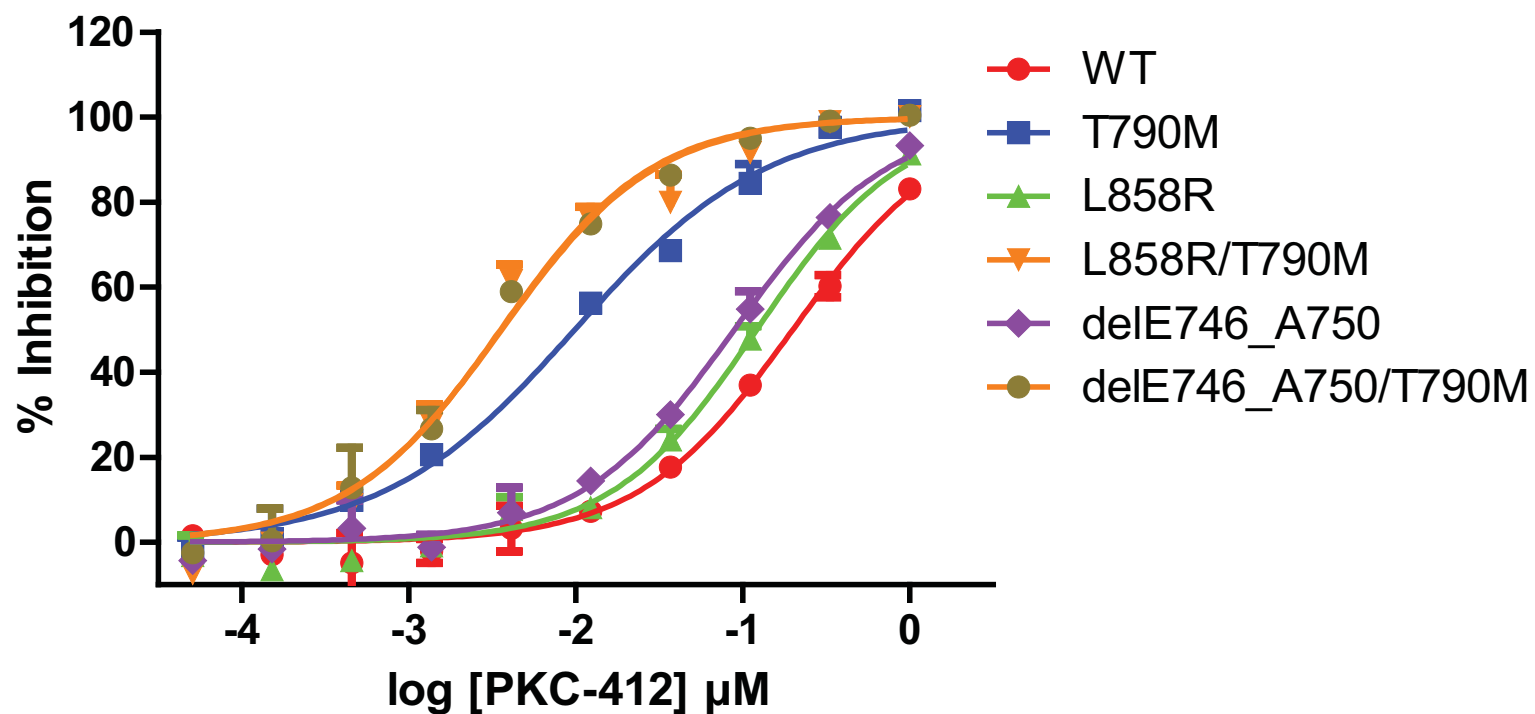

Supplement: NIHMS428041-supplement-3.pdf [file NIHMS428041-supplement-3.pdf]

Figure S3. Lee et al

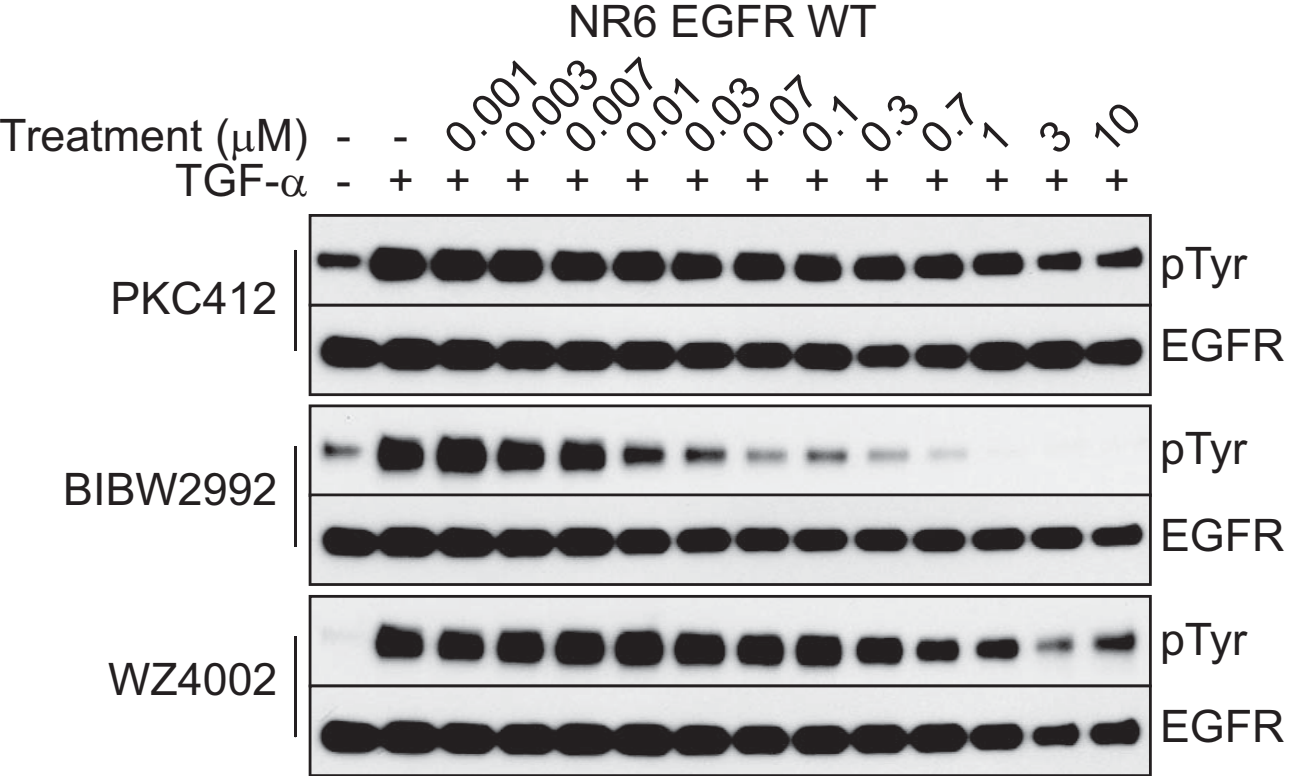

Supplement: NIHMS428041-supplement-4.pdf [file NIHMS428041-supplement-4.pdf]

Figure S4. Lee et al

PC-9 parental

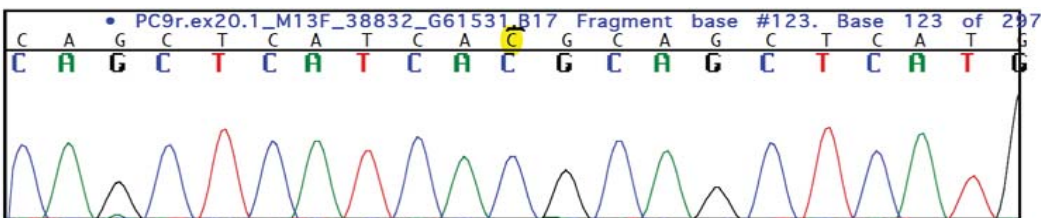

PC-9 ER

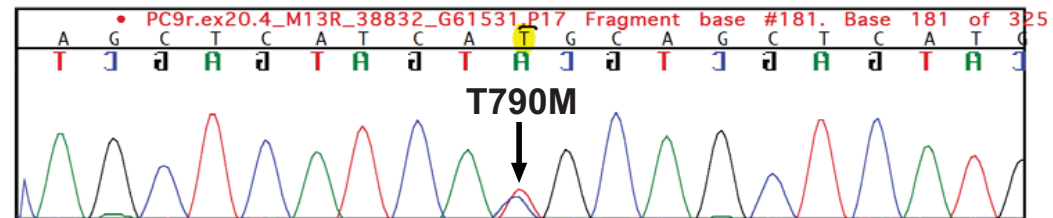

Supplement: NIHMS428041-supplement-5.pdf [file NIHMS428041-supplement-5.pdf]

Figure S5. Lee et al

**A**

PC-9 (delE746\_A750)

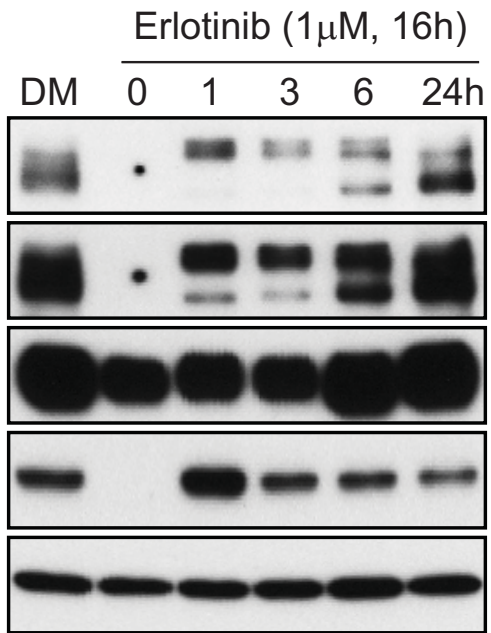

**B**

PC-9/ER (delE746\_A750/T790M)

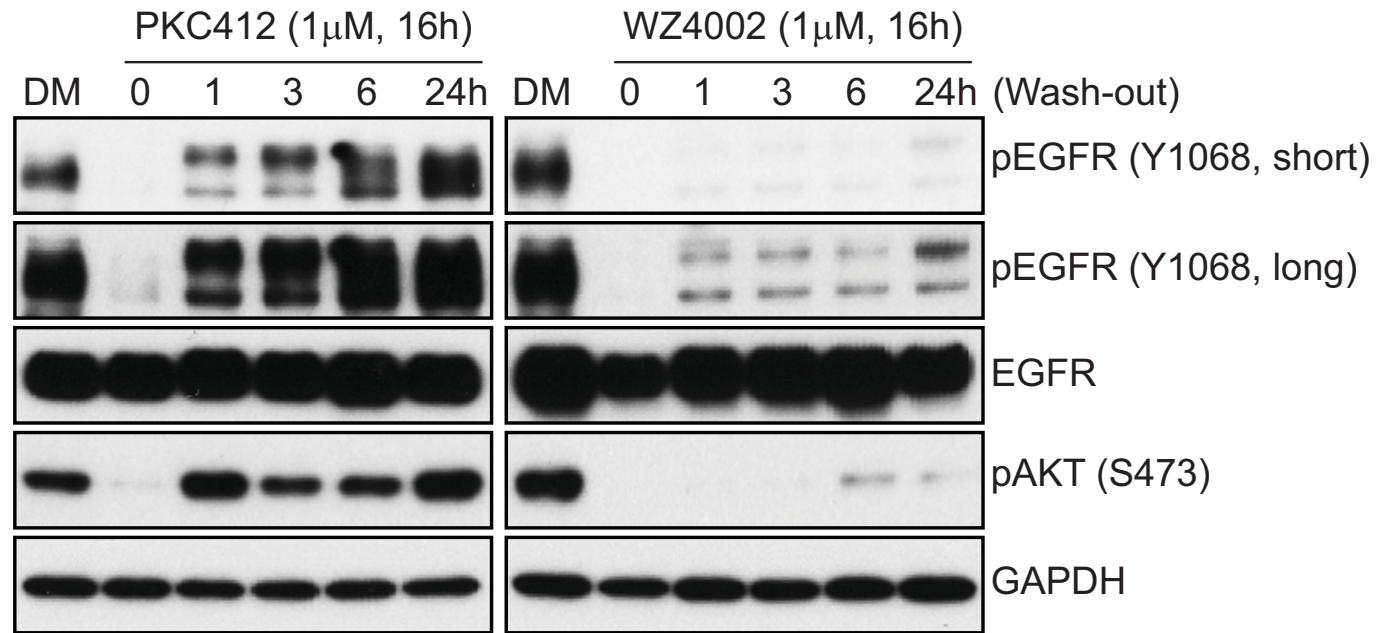

Supplement: NIHMS428041-supplement-6.pdf [file NIHMS428041-supplement-6.pdf]

A

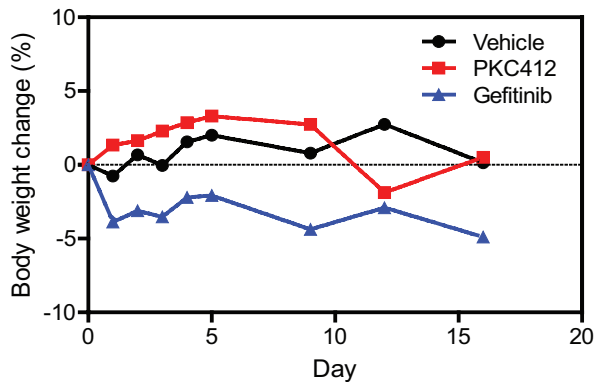

B

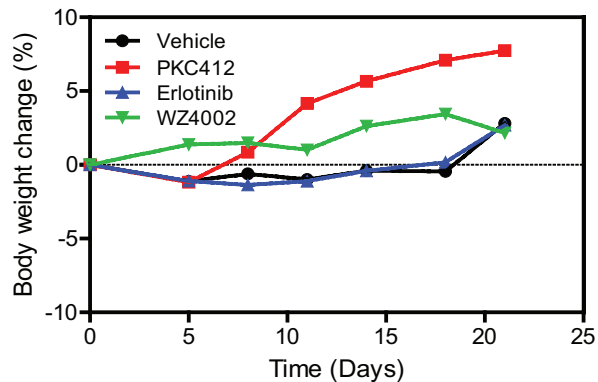

Supplement: NIHMS428041-supplement-7.pdf [file NIHMS428041-supplement-7.pdf]

**A**

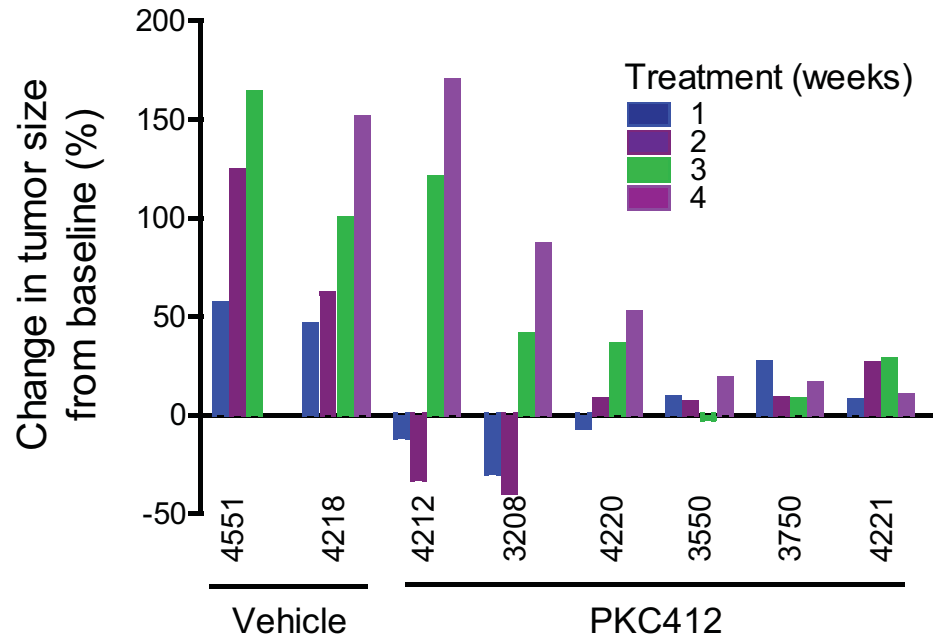

**B**

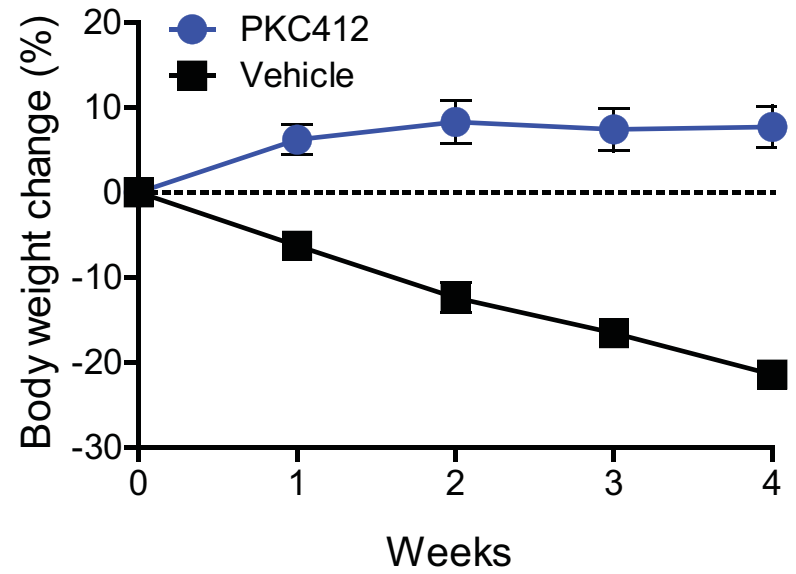

**C**

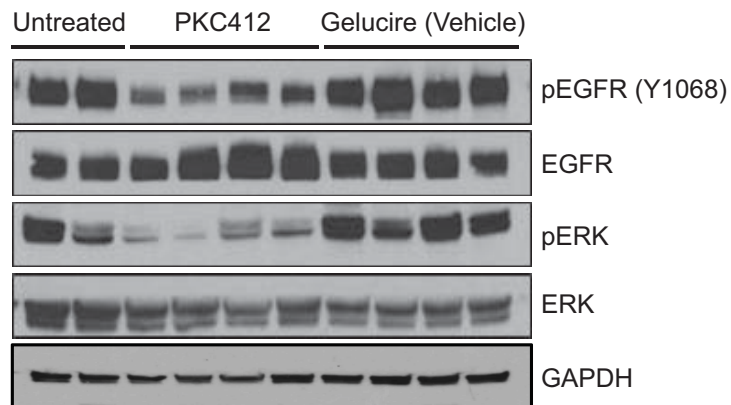

EGFR phosphorylation

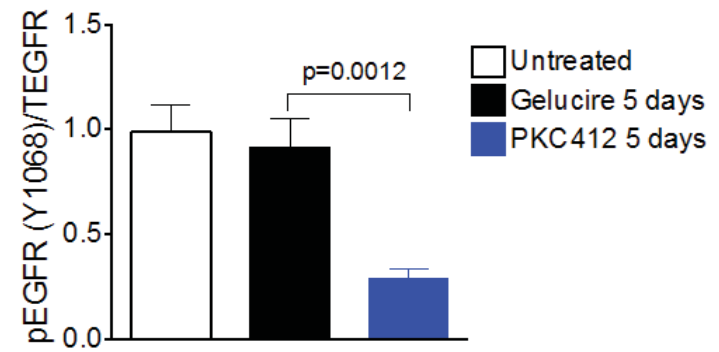

Supplement: NIHMS428041-supplement-9.pdf [file NIHMS428041-supplement-9.pdf]
